# Supplementary material for: Quantitation of L-cystine in Food Supplements and Additives Using 1H qNMR: Method Development and Application
Source: MDPI journal article supplement (doi:10.3390/foods12122421), 2023-06-20
Supplement: s1 [file s1]

# **Quantitation of L-Cystine in Food Supplements and Additives Using $^1\text{H}$ qNMR:**

## **Method Development and Application**

### **Supporting Information**

**Table S1.** Cystine amount in food supplement and food additive samples

| Sample code | Sample kind     | Labeled cystine amount (mg per serving) or purity | Measured cystine amount<br>(per serving for food supplements,<br>per 20 mg for food additives) |      |      |      |          | Measured cystine amount<br>(per serving for food supplements,<br>per 20 mg for food additives) |        |        |        |             |
|-------------|-----------------|---------------------------------------------------|------------------------------------------------------------------------------------------------|------|------|------|----------|------------------------------------------------------------------------------------------------|--------|--------|--------|-------------|
|             |                 |                                                   | 1st                                                                                            | 2nd  | 3rd  | 4th  | Average  | 1st                                                                                            | 2nd    | 3rd    | 4th    | Average     |
| 1           | Food supplement | 10.2                                              | 9.9                                                                                            | 9.9  | 9.5  | 10.1 | 9.9±0.3  | 97.1%                                                                                          | 97.1%  | 93.1%  | 99.0%  | 96.6%±2.5%  |
| 2           | Food supplement | 12.5                                              | 12.3                                                                                           | 12.3 | 12.7 | 12.8 | 12.7±0.3 | 98.4%                                                                                          | 103.2% | 101.6% | 102.4% | 101.4%±2.1% |
| 3           | Food supplement | 25.0                                              | 9.6                                                                                            | 9.6  | 9.1  | 9.3  | 9.3±0.2  | 38.4%                                                                                          | 36.4%  | 36.4%  | 37.2%  | 37.1%±0.9%  |
| 4           | Food supplement | 50.0                                              | 30.3                                                                                           | 30.3 | 36.7 | 33.6 | 33.9±2.7 | 60.6%                                                                                          | 70.2%  | 73.4%  | 67.2%  | 67.9%±5.5%  |
| 5           | Food supplement | 10.0                                              | 9.9                                                                                            | 9.9  | 9.7  | 9.6  | 9.9±0.4  | 99.0%                                                                                          | 104.0% | 97.0%  | 96.0%  | 99.0%±3.6%  |
| 6           | Food supplement | 60.0                                              | 58.5                                                                                           | 58.5 | 59.2 | 59.0 | 59.2±0.6 | 97.5%                                                                                          | 100.0% | 98.7%  | 98.3%  | 98.6%±1.0%  |
| 7           | Food supplement | 8.0                                               | 8.6                                                                                            | 8.6  | 8.8  | 8.7  | 8.6±0.3  | 107.5%                                                                                         | 102.5% | 110.0% | 108.8% | 107.2%±3.3% |
| 8           | Food supplement | 15.8                                              | 0.1                                                                                            | 0.1  | 0.1  | 0.0  | 0.1±0.1  | 0.6%                                                                                           | 0.0%   | 0.6%   | 0.0%   | 0.3%±0.4%   |
| 9           | Food additive   | 98%                                               | 20.4                                                                                           | 20.4 | 19.5 | 19.7 | 19.9±0.4 | 102.0%                                                                                         | 99.5%  | 97.5%  | 98.5%  | 99.4%±1.9%  |
| 10          | Food additive   | 98%                                               | 19.6                                                                                           | 19.6 | 19.8 | 19.1 | 19.4±0.4 | 98.0%                                                                                          | 95.5%  | 99.0%  | 95.5%  | 97.0%±1.8%  |
| 11          | Food additive   | 99%                                               | 19.8                                                                                           | 19.8 | 19.9 | 19.9 | 20.0±0.2 | 99.0%                                                                                          | 101.5% | 99.5%  | 99.5%  | 99.9%±1.1%  |

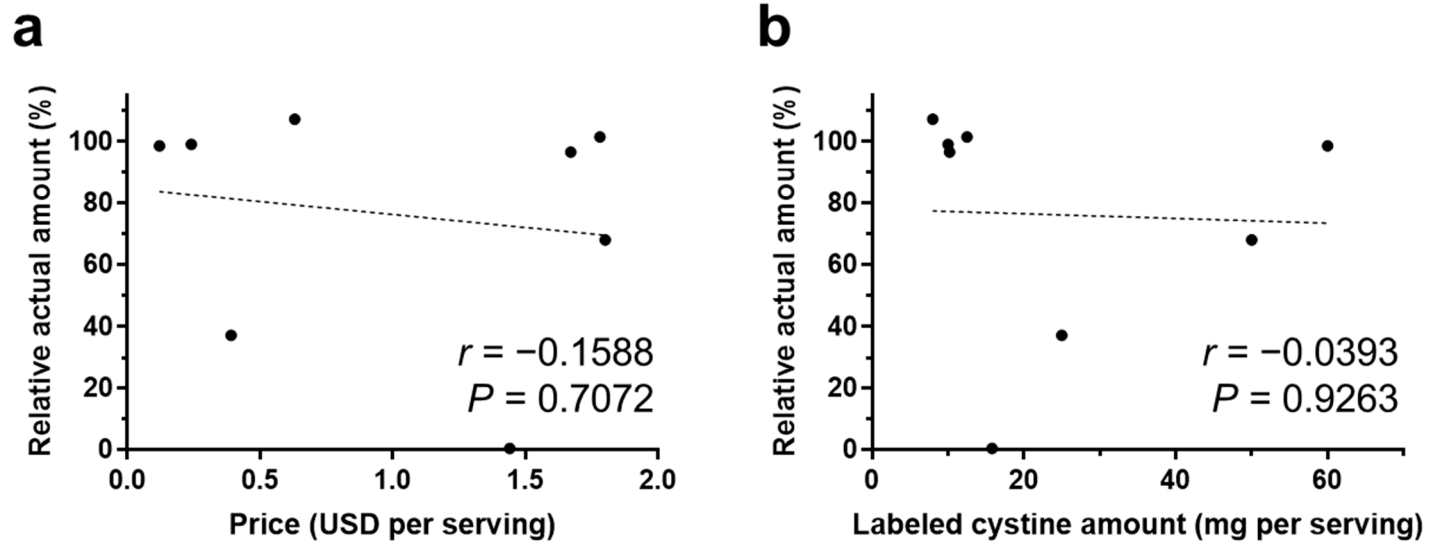

**Figure S1.** Correlations between the relative cystine amount of food supplements and their properties

(a) the price of the supplement per serving; (b) the labeled cystine amount per serving.
